# Supplementary material
Source: PubMed Central journal article supplement (PMC6692818)
Supplement: DB190299SupplementaryData.pdf [file DB190299SupplementaryData.pdf]

## SUPPLEMENTARY DATA

**University of Chicago Clinical Research Center  
and Jesse Brown VA Medical Center  
(Chicago, IL)**

David A. Ehrmann, MD\*  
Karla A. Temple, PhD, RD\*\*  
Abby Rue\*\*  
Elena Barengolts, MD  
Babak Mokhlesi, MD, MSc  
Eve Van Cauter, PhD  
Susan Sam, MD, MSc  
M. Annette Miller, RN

**VA Puget Sound Health Care System and  
University of Washington  
(Seattle, WA)**

Steven E. Kahn, MB, ChB\*  
Karen M. Atkinson, BSN, RN\*\*  
Jerry P. Palmer, MD  
Kristina M. Utzschneider, MD  
Tsige Gebremedhin, BS  
Abigail Kernan-Schloss, BA  
Alexandra Kozedub, MSN, ARNP  
Brenda K. Montgomery, MSN, RN, CDE  
Emily J. Morse, BS

**Indiana University School of Medicine and  
Richard L. Roudebush VA Medical Center  
(Indianapolis, IN)**

Kieren J. Mather, MD\*  
Tammy Garrett, RN\*\*  
Tamara S. Hannon, MD  
Amale Lteif, MD  
Aniket Patel MD  
Robin Chisholm, RN  
Karen Moore, RN  
Vivian Pirics, RN  
Linda Pratt, RN

**University of Colorado Denver/Children's  
Hospital Colorado  
(Denver, CO)**

Kristen J. Nadeau, MD, MS\*  
Susan Gross, RD\*\*  
Philip S. Zeitler, MD, PhD  
Jayne Williams, RN, MSN, CPNP  
Melanie Cree-Green, MD, PhD  
Yesenia Garcia Reyes, MS  
Krista Vissat, RN, MSN, CPNP

**UPMC Children's Hospital of Pittsburgh  
(Pittsburgh, PA)**

Silva A. Arslanian, MD\*  
Kathleen Brown, RN, CDE\*\*  
Nancy Guerra, CRNP  
Kristin Porter, RN, CDE

**Yale University  
(New Haven, CT)**

Sonia Caprio, MD\*  
Mary Savoye, RD, CDE\*\*  
Bridget Pierpont, MS\*\*

**University of Southern California Keck School of  
Medicine/Kaiser Permanente Southern California  
(Los Angeles, CA)**

Thomas A. Buchanan, MD\*  
Anny H. Xiang, PhD\*  
Enrique Trigo, MD\*\*  
Elizabeth Beale, MD  
Ting Chow, MPH  
Fadi N. Hendee, MD  
Namir Katkhouda, MD  
Krishan Nayak, PhD  
Mayra Martinez, MPH  
Cortney Montgomery, BS  
Xinhui Wang, PhD  
Jun Wu, MS

**George Washington University Biostatistics  
Center  
(RISE Coordinating Center; Rockville, MD)**

Sharon L. Edelstein, ScM\*  
John M. Lachin, ScD  
Ashley Hogan Tjaden, MPH  
Mark T. Tripputi, PhD

**Northwest Lipid Research Laboratories  
(Central Biochemistry Laboratory; Seattle, WA)**

Santica Marcovina, PhD\*  
Jessica Harting\*\*  
John Albers, PhD

**Belmar Pharmacy  
(Drug Distribution Center; Lakewood, CO)**

Dave Hill

**NIH/NIDDK  
(Bethesda, MD)**

Peter J. Savage, MD  
Ellen W. Leschek, MD
